# Supplementary material for: Ambient-dried highly flexible copolymer aerogels and their nanocomposites with polypyrrole for thermal insulation, separation, and pressure sensing
Source: Royal Society of Chemistry journal article supplement (doi:10.1039/c9py00751b), 2019-01-01
Supplement: c9py00751b5.pdf [file c9py00751b5.pdf]

## Supplementary Information

### **Ambient-Dried Highly Flexible Copolymer Aerogels and their Nanocomposites with Polypyrrole for Thermal Insulation, Separation, and Pressure Sensing**

*Guoqing Zu,<sup>1,\*</sup> Kazuyoshi Kanamori,<sup>2,\*</sup> Ayaka Maeno,<sup>3</sup> Hironori Kaji,<sup>3</sup> Kazuki Nakanishi<sup>2</sup>, Jun Shen<sup>4</sup>*

<sup>1</sup>School of Materials Science and Engineering, Tongji University, Shanghai 201804, P. R. China

<sup>2</sup>Department of Chemistry, Graduate School of Science, Kyoto University, Kitashirakawa, Sakyo-ku, Kyoto 606-8502, Japan

<sup>3</sup>Institute for Chemical Research, Kyoto University Gokasho, Uji, Kyoto 611-0011, Japan

<sup>4</sup>Shanghai Key Laboratory of Special Artificial Microstructure Materials and Technology, Pohl Institute of Solid State Physics, Tongji University, Shanghai 200092, P. R. China

\*Corresponding authors:

E-mail: guoqingzu@tongji.edu.cn (G. Zu),

kanamori@kuchem.kyoto-u.ac.jp (K. Kanamori)

**This PDF file includes:**

Captions for Movies S1 to S4

Figures S1 to S8

**Other Supplementary Materials for this manuscript include the following:**

Movies S1 to S4

**Movie list:**

**Movie S1.** High compression flexibility of VT21P shown by hand compression.

**Movie S2.** High bending flexibility of VT51 shown by hand bending.

**Movie S3.** Efficient separation of *n*-octane and water with VT21.

**Movie S4.** Strain-sensitive conductivity of VT21P.

**Figures:**

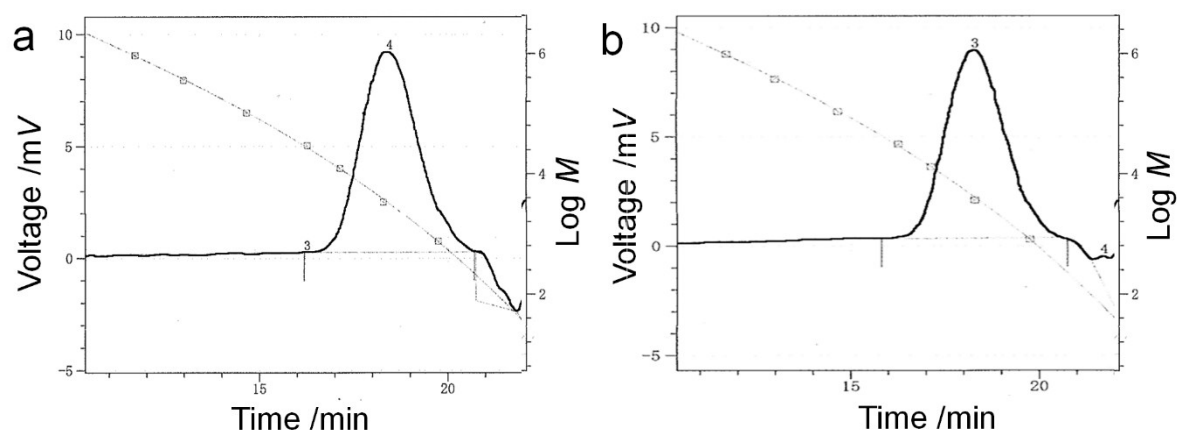

**Figure S1.** The GPC data of (a) VT21 and (b) VT51. The measured number-average molecular weight ( $M_n$ ),  $M_w$ , and  $M_w/M_n$  of VT21 were 2340, 4149, and 1.77, respectively, while the  $M_n$ ,  $M_w$ , and  $M_w/M_n$  of VT51 were 2770, 4995, and 1.80, respectively.

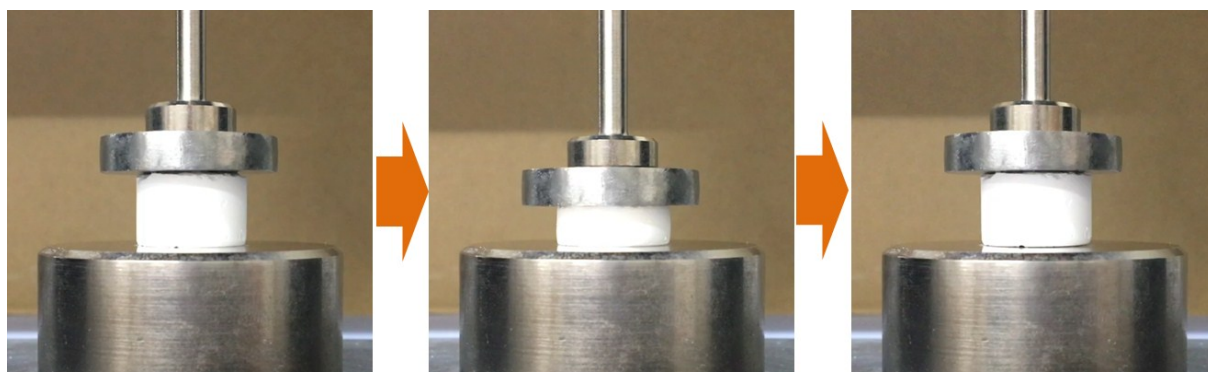

**Figure S2.** Photographs of a uniaxial compression–decompression test on VT11.

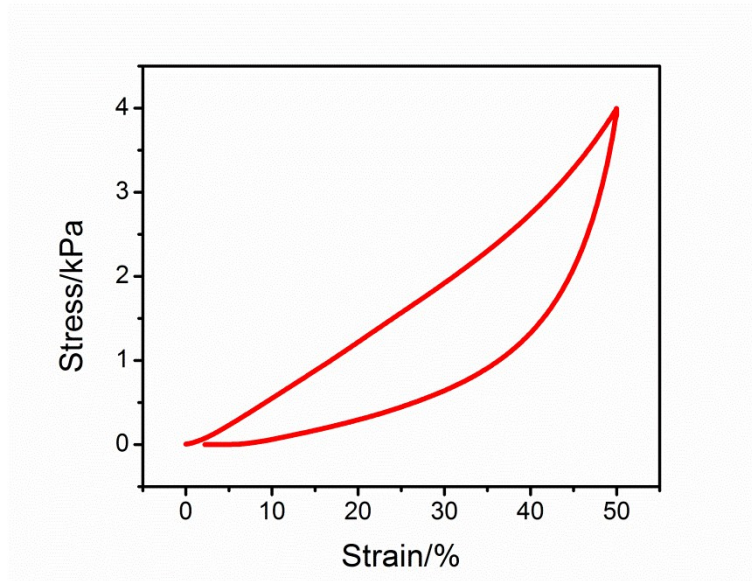

**Figure S3.** Stress–strain curves of a uniaxial compression–decompression test on VT11.

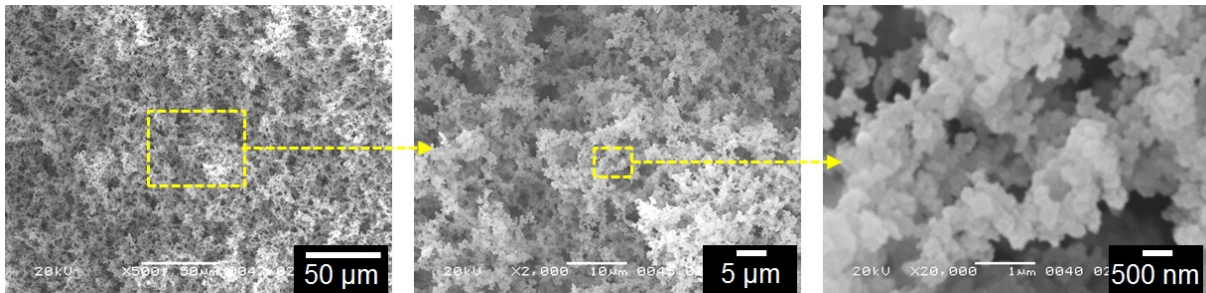

**Figure S4.** SEM images of VT21 after compression–decompression with 50% strain for 100 cycles.

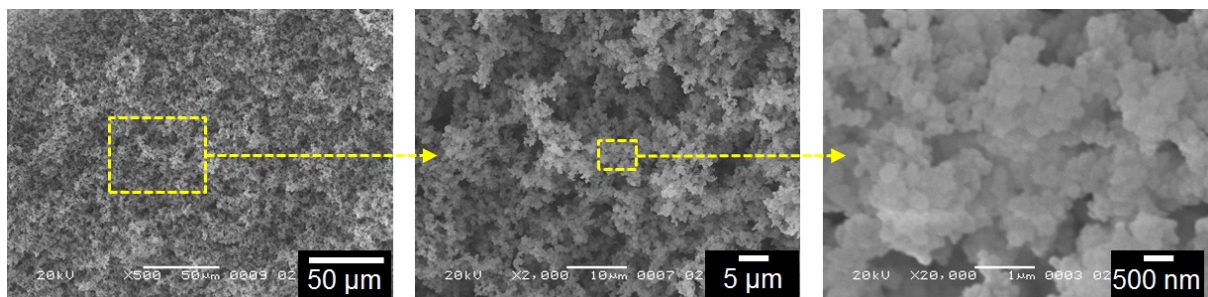

**Figure S5.** SEM images of VT21P after compression–decompression with 50% strain for 100 cycles.

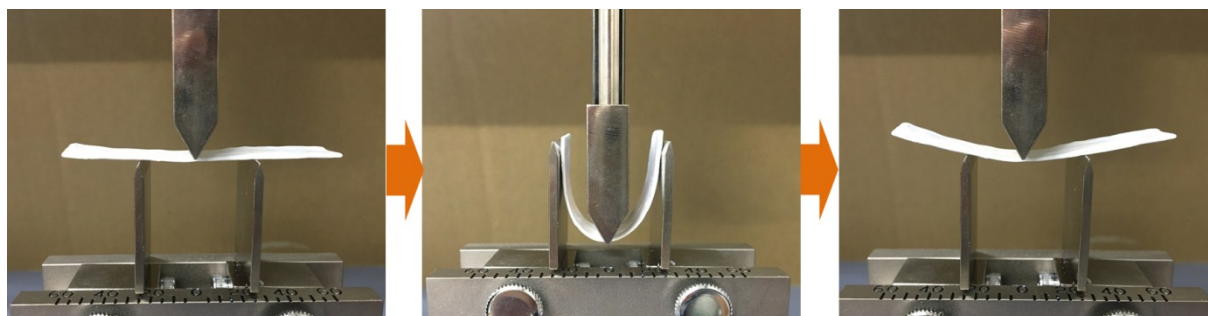

**Figure S6.** Photographs of a three-point bending test on VT21.

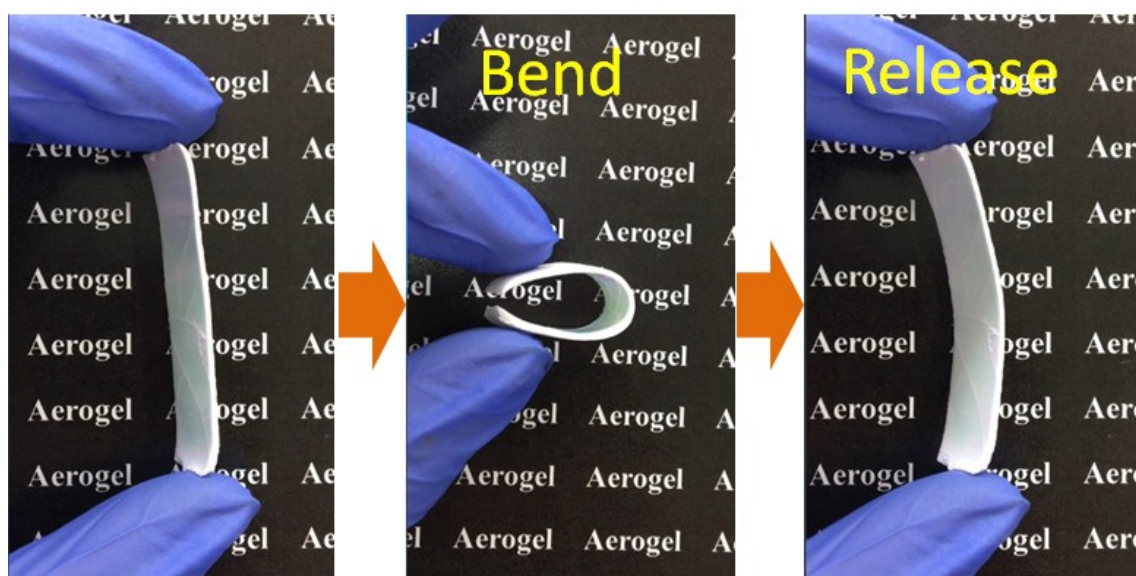

**Figure S7.** Photographs of a hand bending test on VT21

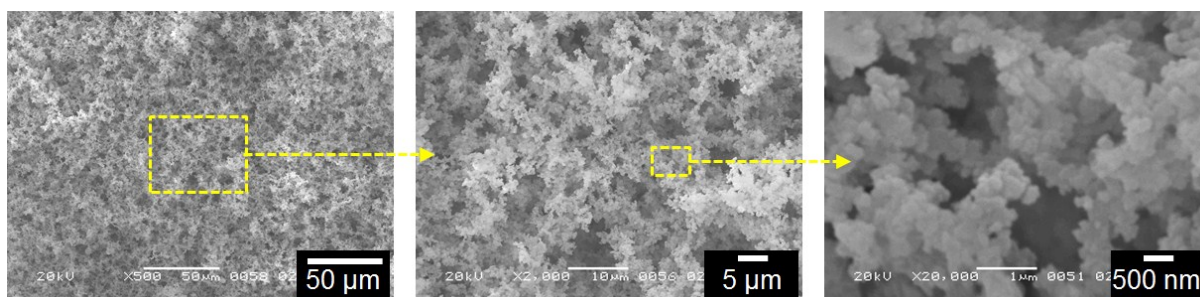

**Figure S8.** SEM images of VT21 after absorption for *n*-octane and drying for 10 cycles. Its morphology remains unchanged after 10 cycles.
